# Supplementary material for: Chemical and Mechanical Properties of Metakaolin-Based Geopolymers with Waste Corundum Powder Resulting from Erosion Testing
Source: MDPI journal article supplement (doi:10.3390/polym14235091), 2022-11-23
Supplement: s1 [file s1]

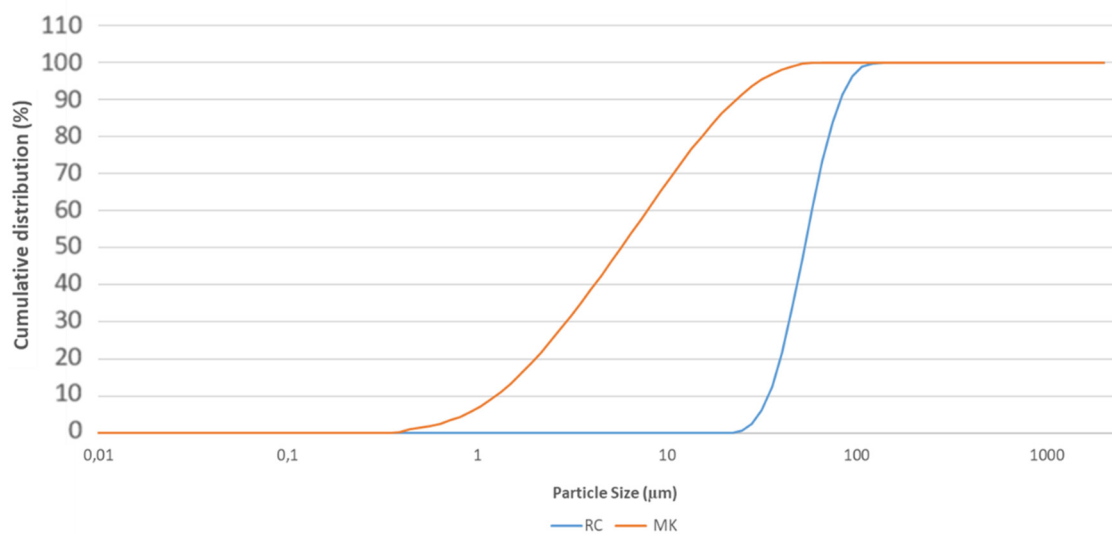

**Figure S1.** Comparison of particle size distribution curves of pure metakaolin (MK) and the as-received fine recycled corundum powder (RC).
